# Supplementary material for: Calculating the turbulent fluxes in the atmospheric surface layer with neural networks
Source: Copernicus journal article supplement (doi:10.5194/gmd-2018-263), 2018-11-21
Supplement: Supplementary file [file gmd-2018-263-AC1-supplement.pdf]

# Calculating the turbulent fluxes in the atmospheric surface layer with neural networks

Lukas Hubert Leufen<sup>1,2</sup> and Gerd Schädler<sup>1</sup>

<sup>1</sup>Institute of Meteorology and Climate Research - Department Troposphere Research, Karlsruhe Institute of Technology, Karlsruhe, Germany

<sup>2</sup>now at Forschungszentrum Jülich GmbH, Jülich, Germany

**Correspondence:** G. Schädler (gerd.schaedler@kit.edu)

**Abstract.** The turbulent fluxes of momentum, heat and water vapour link the Earth's surface with the atmosphere. The correct modelling of the flux interactions between these two systems with very different time scales is therefore vital for climate and weather forecast models. Conventionally, these fluxes are modelled using Monin-Obukhov similarity theory (MOST) with stability functions derived from a small number of field experiments; this results in a range of formulations of these functions and thus also in differences in the flux calculations; furthermore, the underlying equations are nonlinear and have to be solved iteratively at each time step of the model. We tried here a different and more flexible approach, namely using an artificial neural network (ANN) to calculate the fluxes resp. the scaling quantities  $u_*$  and  $\theta_*$ , thus avoiding function fitting and iteration. The network was trained and validated with multi-year datasets from seven grassland, forest and wetland sites worldwide using the Broyden–Fletcher–Goldfarb–Shanno (BFGS) quasi-Newton backpropagation algorithm and six-fold cross validation. Extensive sensitivity tests showed that an ANN with six input variables and one hidden layer gave results comparable to (and in some cases even slightly better than) the standard method. Similar satisfying results were obtained when the ANN routine was implemented in a one-dimensional stand alone land surface model (LSM), opening the way to implementation in three-dimensional climate models. In case of the one-dimensional LSM, no CPU time was saved when using the ANN version, since the small time step of the standard version required only one iteration in most cases. This could be different in models with longer time steps, e.g. global climate models.

## 1 Introduction

The turbulent fluxes of momentum, heat, water vapour and trace gases link the atmosphere with the Earth's surface. The faithful representation of these fluxes is therefore essential for a proper functioning of climate and weather forecast models. In these models, the fluxes are parameterised using a velocity scale  $u_*$  and a (potential) temperature scale  $\theta_*$  as momentum flux  $\tau = \rho u_*^2$  and heat flux  $H = -\rho c_p u_* \theta_*$  ( $\rho$  is air density,  $c_p$  is air heat capacity).  $u_*$  and  $\theta_*$  depend on near surface wind and temperature, their gradients, surface roughness and atmospheric stability. In the framework of the almost exclusively used Monin-Obukhov similarity theory (MOST; Monin and Obukhov, 1954), one has to determine stability functions for momentum and heat which depend on a single stability parameter (for details, see e.g. Arya, 2001). These stability functions must be determined empirically and were obtained by different authors from regressions on observations from a small number

of field experiments. As shown in Höglström (1996), the results vary considerably, especially in the very stable and the very unstable regimes, due to a lack and/or a large scatter of the observations and possibly violations of the assumptions of MOST. Furthermore, the underlying nonlinear equations must be solved iteratively at each time step of a model run which can be time consuming.

5 In the present study, artificial neural networks (ANN) and their ability to simulate a wide range of relationships between input and output variables as a universal approximator (Hornik et al., 1989) are used to model the stability functions. Our goals in this study are a) to see how well ANNs can approximate the stability relationships, b) possibly increase accuracy through using larger data sets, c) using the more flexible ANN approach instead of function fitting, and d) possibly speed up the calculations. With positive outcomes, we ultimately want to replace the relevant subroutines in a climate model by ANNs in order  
10 to improve overall model performance.

A good overview of various applications of ANNs in different disciplines can be found in Zhang (2008). Several studies (e.g. Gardner and Dorling, 1999; Elkamel et al., 2001; Kolehmainen et al., 2001) describe applications of ANNs to meteorological and air quality problems. In these studies, long time series of observational data are available for ANN training and only one station is involved in the training and validation process. Comrie (1997) compares ozone forecasts using ANNs with forecasts  
15 using standard linear regression models and find that ANNs are “somewhat, but not overwhelmingly” better than the regression models. Best performance is obtained with an ANN incorporating time lagged data. Gomez-Sanchis et al. (2006) use a multi-layer perceptron (MLP) to predict ozone concentrations near Valencia based on meteorological and traffic information. Different model architectures are tested and good agreement with observations is found. However, for different years different model architectures for optimal results are required, which they attribute to varying relative importance of the input variables.  
20 Elkamel et al. (2001) use a one hidden layer ANN and meteorological and precursor concentrations to predict ozone levels in Kuwait. They find that the ANN gives consistently better predictions than both linear and nonlinear (log output) multivariate regression models. Kolehmainen et al. (2001) compare the ability of self-organising maps and MLP to predict  $NO_2$  concentrations when combined with different methods to preprocess the data. They find that direct application of the MLP give best results. In all these studies just one hidden layer is sufficient and it is pointed out that careful selection of the input data is  
25 crucial. Some papers deal with the idea of replacing whole models or model components by ANNs. For example, Knutti et al. (2003) teach a neural network to simulate certain output variables of a global climate model and use the result to establish probability density functions as well as to enlarge a global climate model ensemble considerably. Gentine et al. (2018) use an ANN to parameterise the effects of subgrid scale convection in a global climate model. The ANN learns the combined effects of turbulence, radiation and cloud microphysics from a convection resolving submodel. They find that using the ANN, many  
30 of these processes can be predicted skilfully, but spatial variability is reduced compared to the original climate model; they attribute this to chaotic dynamics accounted for in the original model, but not in the version using the ANN which is deterministic by construction. Sarghini et al. (2003) and Vollant et al. (2017) use an ANN trained with direct numerical simulation data as a subgrid scale model in a large eddy simulation model. Sarghini et al. (2003) find that the ANN is able to reproduce the nonlinear behaviour of the turbulent flows, whereas Vollant et al. (2017) find that the ANN performs well for the flow cases the

ANN was trained for, but that it can fail for other flow configurations.

This paper is structured as follows: in Chapter 2, we give a short overview over Monin-Obukhov similarity theory and artificial neural networks, introduce cross-validation, present the data used (including important quality checks) and describe our strategy to find the best network. Thereafter, trained ANNs (which are in fact MLPs, but we will stick to the generic name ANN here) are validated and results are discussed (Chapter 3). In Chapter 4, the best performing ANN is implemented in a one-dimensional land surface model (LSM) and results are compared with the ones of the standard version. A summary is given in Chapter 5.

## 2 Methods and data

### 2.1 Monin-Obukhov similarity theory (MOST)

The turbulent fluxes of momentum, heat, water vapour and trace gases between the Earth's (land and water) surface and the atmosphere are usually calculated on the basis of Monin-Obukhov similarity theory (MOST, Monin and Obukhov (1954)). We give here a very short survey over MOST, focussing on momentum and heat fluxes; details can be found in Arya (2001). Assuming homogeneous terrain, quasistationary (i.e fair weather) conditions and small terrain roughness, MOST postulates that turbulence in the surface (also called Prandtl or constant flux) layer depends only on four quantities: the height above ground resp. canopy  $z$ , a velocity scale  $u_*$ , a temperature scale  $\theta_*$  and a buoyancy term  $g/\theta$ , where  $g$  is gravitational acceleration and  $\theta$  denotes potential temperature. According to the Buckingham Pi-Theorem, these four quantities based on length, time and temperature can be combined to a single non-dimensional quantity  $\zeta = z/L$ , where  $L = u_*^2\theta/(\kappa g\theta_*)$  is the Obukhov length and  $\kappa \approx 0.40$  is the von Kármán constant ; other dimensionless quantities like dimensionless wind and temperature gradients can be expressed as functions of  $\zeta$ . The Obukhov length  $L$  measures the stratification of the surface layer: large (positive or negative) values (i.e.  $\zeta \approx \pm 0$ ) indicate neutral stratification, positive values indicate stable stratification, negative values indicate unstable stratification. Since momentum flux is expressed as  $\tau = \rho u_*^2$ , and heat flux as  $H = -\rho c_p u_* \theta_*$  ( $\rho$  is air density,  $c_p$  is air heat capacity), our goal is to determine  $u_*$  and  $\theta_*$  from known quantities, which are in our case modelled or observed wind and temperature gradients in the surface layer.

Non-dimensional wind shear  $\phi_m$  and the non-dimensional gradient of the potential temperature  $\phi_h$  (also called stability functions) can be written as

$$\phi_m(\zeta) = \frac{\kappa z}{u_*} \frac{\partial u}{\partial z}, \quad \phi_h(\zeta) = \frac{\kappa z}{\theta_*} \frac{\partial \theta}{\partial z} \quad (1)$$

respectively, where  $u$  is the mean wind speed at height  $z$ . The "universal" functions  $\phi_m$  and  $\phi_h$  can be obtained from simultaneously measured values of the wind speed and temperature gradients and the momentum and heat fluxes (providing  $u_*$  and  $\theta_*$ ). Conversely,  $u_*$  and  $\theta_*$  can be calculated from these universal functions, given the wind speed and temperature gradients; this is how these functions are used in weather and climate models. Data from field experiments have been used to derive these universal functions, notably the Kansas experiment in 1968 by Businger et al. (1971). Generally, the stability functions thus

obtained have the form

$$\phi_{m,h}(\zeta) = (\alpha_{m,h} + \beta_{m,h}\zeta)^{\gamma_{m,h}} \quad (2)$$

with the coefficients depending on  $\zeta > 0$  or  $\zeta \leq 0$ . An overview of these functions can be found in Högström (1988); it is shown there that there is considerable scatter in the data (especially under very stable and very unstable conditions) and, as a result, also in the derived universal functions. In applications, differences are known rather than gradients. Integrating the functions (1) between a reference height  $z_r$  and  $z$  yields

$$\kappa(u(z) - u(z_r))/u_* = \ln(z/z_r) - \Psi_m(z/L), \quad \kappa(\theta(z) - \theta(z_r))/\theta_* = \ln(z/z_r) - \Psi_h(z/L) \quad (3)$$

where

$$\Psi_{m,h}(z/L) = \int_{z_r/L}^{z/L} (1 - \phi_{m,h}(u)) du/u \quad (4)$$

For the purpose of climate modelling, i.e. obtaining fluxes from simulated wind and temperature profiles,  $u_*$  and  $\theta_*$  need to be derived from wind resp. temperature data at two heights and eqns. (1) or (3). Since  $\zeta$  itself depends on  $u_*$  and  $\theta_*$ , this amounts to solving a system of two nonlinear equations; we will call this traditional method the MOST method.

## 2.2 Neural networks

We describe here only those aspects of neural networks which are relevant to our study; for more information on neural networks, the reader is referred the literature, e.g. (Rojas, 2013; Kruse et al., 2016). Neural networks, or more precisely artificial neural networks (ANN), are a widely used technique to solve classification and regression problems as well as to analyse time series (Zhang, 2008). The building blocks of an ANN are the so-called neurons, arranged in different layers. An ANN has at least an input and an output layer; between these, there can be so-called hidden layers. The neurons in successive layers (but not within the same layer) are connected through weights (see Figure 7). A neuron processes input data as follows:

$$o_j = f \left( \sum_i^N o_i \cdot w_{ij} \right), \quad (5)$$

where  $o_j$  is the output of the neuron  $j$ ,  $N$  is the number of neurons in the preceding layer (including the bias neuron, see below),  $o_i$  is the output of the  $i$ th neuron in the preceding layer and  $w_{ij}$  is corresponding weight. Nonlinear behavior of the network is induced by using nonlinear activation functions  $f$ . Each neuron belongs to a unique layer in a directed graph. Here, we use so-called multi-layer perceptrons (MLP), also known as feed-forward networks due to the unidirectional information flow. Each MLP consists of an input, an output and at least one hidden layer with an arbitrary number of neurons. The input layer takes (normalised) input data and the output data returns the (also normalised) results of the MLP. Normalisation is essential for equal weighting of the input and for consistency with the domain and range of the activation functions. Input information is propagated from layer to layer while each neuron responds to the signal. Bias neurons are used to adjust the activation level.

All free parameters (i.e. weights) of a MLP need to be determined by a training process. In the case of supervised learning, the MLP knows its deviation from target values at every time and an error can be calculated using this deviation (Zhang, 2008). The aim of the training is to minimise an error metric by adjusting the network's weights. Here we use the mean squared error (MSE)

$$5 \quad MSE = \frac{1}{|P|} \sum_{p \in P} \frac{1}{N^\Omega} \sum_j^{N^\Omega} (t_{j,p} - o_{j,p})^2 \quad (6)$$

$P$  is the total number of data points,  $N^\Omega$  is the number of neurons in the output layer,  $t_{j,p}$  is the target value of data point  $p$  and  $o_{j,p}$  is the output of the MLP for data point  $p$ . In the study described here, we use a MLP with tangens hyperbolicus as activation functions in the hidden layer(s) (here one or two) and linear functions in the output layer trained by the Broyden–Fletcher–Goldfarb–Shanno (BFGS) quasi-Newton backpropagation algorithm (Broyden, 1970; Fletcher, 1970; Goldfarb, 1970; Shanno, 1970).

### 2.3 Data

To train and validate the neural network, data from 20 meteorological towers in Europe, Brazil and Russia over different land use types including forest, grassland and crop fields were collected. All data were measured after 2000 and observation periods range from a few months to several years. Figure 1 shows a map of the sites which provided data. Stations varied widely in environmental surrounding, instrumental set-up and measurement heights. The tower configuration of the sites is shown schematically in Figure 2. For our purposes, we required temperatures and wind speed in two measurement heights as well as the momentum and sensible heat fluxes to calculate the scaling quantities  $u_*$  and  $\theta_*$  (see Chapter 2.5). If not available, density was calculated from the ideal gas equation using virtual temperature in case of available humidity data, otherwise we used the temperature of dry air. For forests, all observations had to be above the canopy. The original temporal resolution of the data was either 10 minutes or 30 minutes; these were aggregated to 1-hour averages.

An important step before using data as input for the ANN was to check if the data were compatible with Monin-Obuhkov theory, i.e. if an (at least approximate) functional relationship between  $\zeta$  and the right-hand sides of (1) was present and if yes, how well they were represented by the universal stability functions (1). It turned out that for some sites, no relationship existed. Reasons for this could be a violation of the assumptions of the Monin-Obuhkov theory like inhomogeneous terrain around the site or wind direction dependence of the roughness length. Data from these sites were not used further, except for the DE-Tha site (see Chapter 4). The remaining stations (see Table 2) with about 113,500 hourly averaged data points in total (see Table 3) were used to train and validate the networks. For these, agreement generally was better for temperature than for wind; also, agreement was better for unstable than for stable stratification, which is often mentioned in the literature.

Data were preprocessed before they were presented to the ANN. Input and output data were normalised according to their extrema to the interval  $[0, 1]$  (see Table 1). Furthermore, weak wind situations with wind speeds below  $0.3 \text{ ms}^{-1}$  were filtered out. Because of large scatter of wind and temperature gradients under atmospheric conditions with absolute heat fluxes below

10  $\text{Wm}^{-2}$  or small scaling wind speeds ( $u_* < 0.1 \text{ ms}^{-1}$ ), such data were excluded. Finally, the signs of the temperature scale  $\theta_*$  and of the potential temperature gradient had to be the same, thus excluding counter-gradient fluxes which can be observed over forest (Denmead and Bradley, 1985) and ice (Sodemann and Foken, 2005), but violate the assumptions of MOST (Foken, 2017a, b).

## 5 2.4 Cross-validation and generalization

Trained networks were validated using  $k$ -fold cross-validation (Kohavi, 1995; Andersen and Martinez, 1999) to prevent overfitting (Domingos, 2012). Overfitting originates from the trade-off to minimise the error on given data and to maximise performance on new unknown data (Chicco, 2017). In a first experiment, the full data set is divided into  $k = 6$  subsets by a random data split with approximately equal size first. Cyclically, one subset is kept for independent testing, the remaining  $k - 1$  subsets are used for training and validation. With this experiment, we can show that ANNs are able to learn from the data and to represent their characteristics. In a second experiment, we go one step further and check if the found ANNs can handle not only unknown data but also completely new stations not used previously, i.e. if they are able to generalize. For this experiment, we decided to validate trained models with the station NL-Cab and to test the best ANNs finally on the station DE-Keh which had been left out in the training and validation phases of this experiment (see details on stations in Chapter 2.3). For these two stations, the traditional MOST method performed best; thus, they present a strong challenge for the ANNs to achieve similar quality.

## 2.5 ANN setup and selection of best ANN

Neural networks are very flexible in terms of number of layers, number of nodes, error metrics, training method, activation function etc.; thus, a series of sensitivity runs was performed, which always consisted of a training and a validation phase. To find an optimal network architecture, we varied the following parameters:

- The number and type of input variables
- The number of hidden layers (one or two)
- The total number of nodes in the hidden layer(s) (between 1 and 14)

To avoid an excessive number of sensitivity runs, the parameters listed in Table 1 were kept fixed based on recommendations in the literature (Zhang, 2008; Kruse et al., 2016). Training is done in batch mode, therefore the network's weights are adjusted after each epoch. Training ended at most after 1000 epochs or if the error on the validation data increased for 50 successive epochs (early stopping). In the latter case, the state of the trained network with the lowest error on the validation data (and not the early stopping state) was set as final state. We tested network architectures with six and seven element input vectors. The six element input vector consisted of the wind speed and potential temperature averages over the two heights, the vertical gradients of wind and potential temperature and their ratio and a classifier to distinguish between low ( $c_{veg} = 0$ ) and tall ( $c_{veg} = 1$ ) vegetation. For the seven element input vector, we replaced the temperature gradient by its absolute value and

added an additional input node describing the sign of potential temperature gradient. The target vector remained in both cases a two element vector consisting of the wind scale  $u_*$  and the temperature scale  $\theta_*$ .

As mentioned above, we experimented with ANNs having one and two hidden layers. For the ANNs with one hidden layer, we varied the number of neurons in the hidden layer from one to twice the size of the input layer. For ANNs with two hidden layers, the number of neurons in each layer is increased up to the number of input neurons.

All networks were trained to minimise the overall (sum of  $u_*$  and  $\theta_*$ ) MSE on normalised data from (6). To compare the different ANNs, we used: the root mean squared error (RMSE)  $RMSE = \sqrt{MSE}$ ,  
the mean absolute error (MAE)

$$MAE = \frac{1}{|P|} \sum_{p \in P} \frac{1}{N^\Omega} \sum_{j=1}^{N^\Omega} |t_{j,p} - y_{j,p}| \quad (7)$$

and Pearson's correlation coefficient  $r$

$$r = \frac{1}{N^\Omega} \sum_{j=1}^{N^\Omega} \frac{\sum_p (y_{j,p} - \bar{y}_j)(t_{j,p} - \bar{t}_j)}{\sqrt{\sum_p (y_{j,p} - \bar{y}_j)^2} \cdot \sqrt{\sum_p (t_{j,p} - \bar{t}_j)^2}} \in [-1, 1], \quad (8)$$

where  $\bar{y}_j$  and  $\bar{t}_j$  are the averages of the  $j$ th net output and the target value with  $\bar{y}_j = \frac{1}{|P|} \sum_p y_{j,p}$  and  $\bar{t}_j = \frac{1}{|P|} \sum_p t_{j,p}$ .

When ANNs are to be used in climate models, one has to find a trade-off between two aspects: on the one hand, the model should perform well according to the quality metrics described above; on the other hand, a superior model in terms of small errors but with higher computational demands may not be the best choice to use in climate models where saving computing time is a very high priority criterion. For ANNs, computing time normally increases with complexity of a network, i.e. with its size. We therefore tested also ANNs with smaller-than-optimal numbers of neurons in view of this trade-off. To find smaller networks requiring possibly less computing time, we looked at networks that meet the requirement that the size of each hidden layer  $n_{h_i}$  is less or equal to the size of the input layer  $n_I$  minus 1.

$$n_I - 1 \geq n_{h_1} (\geq n_{h_2}) \quad (9)$$

This condition was found after some experimenting and is somewhat arbitrary, but there is no hard rule defining the simplicity of a model. Here, we call ANNs that satisfy this condition simple networks.

### 3 Results

As described in sec. Chapter 2.4, ANNs are always trained on the training data set only and validated on a disjoint validation data set. If the MSE on the validation set rises continuously, training is stopped to prevent overfitting (early stopping). After this training and validation stage, the ability of the thus found ANNs to generalise is tested on data completely new to the ANNs. All in all, more than 100000 nets were trained and tested this way.

### 3.1 Effect of data splitting

The validation results from ANNs with six inputs and one single hidden layer trained under six-fold cross-validation with random data splitting are shown in the box-and-whiskers plot in Figure 3 as a function of the number of hidden neurons. One can see that the validation MSE decreases with increasing number of hidden neurons and reaches an asymptotic value of about 5 0.008 already with 6 to 7 neurons. Furthermore, the scatter of MSE is quite small, meaning that the quality of the results of ANNs trained on different sets varies only slightly.

If the training data are not split randomly but station-wise, a larger MSE and a considerably larger scatter of MSE results. Comparing Figure 4 with Figure 3 shows that MSE is roughly doubling, whereas scatter increases by about a factor of ten, almost independent of the network architecture. On the other hand, increasing the network size doesn't necessarily imply a 10 lower MSE. Using two hidden layers reduces slightly the median and error minimum, but increases the MSE spread, too. Comparison of Figure 3 with Figure 4 also shows that the station-wise error minima are comparable to the ones obtained from random data split. In both types of validation, ANNs with one and two hidden layers are not significantly different.

All in all, comparing Figure 3 with Figure 4 shows that the station-wise data split reduces the ANN performance substantially. This implies that using not enough stations as well as station-wise training impairs the generalization of learned relationships 15 between inputs and target values. Among the reasons for this could be the tendency of the ANNs to overfit training data by memorising relationships and local effects contaminating the validity of MOST like not ideal positioning of sites or not ideal atmospheric conditions. These findings support the need for independent testing with data yet unknown to the ANN in order to estimate the ANNs real ability to generalize. This will be discussed in the next section.

### 3.2 Generalization to unknown data

20 After having shown that ANNs are able to extract  $u_*$  and  $\theta_*$  from training data successfully, our next step is to assess how the ANNs found in the previous section can handle input from stations which weren't used neither for training nor for validation, i.e. data completely unknown to them; this simulates the situations where ANNs are used in climate models (where grid points play the role of stations). To test this, we choose the station NL-Cab for validation and DE-Keh as the unknown station. We selected these two stations because the standard MOST method performed best for these stations and it is therefore a 25 strong challenge for the ANNs to produce equivalent results. The results of the nets performing best on the validation set are summarised in Table 4, where we compare the ANNs according to increasing complexity of their net architecture. For comparison and in view of reducing computation time, we show in this table also the results of the best simple networks (as defined in section Chapter 2.5). Table 4 shows that in terms of MSE and correlation coefficient  $r$ , all ANNs perform better than the traditional MOST method on the validation data set (NL-Cab). Applying these ANNs to the test data set DE-Keh results 30 in an increased MSE and lower correlation coefficient, whereas the traditional MOST method performs better on the test data set. Among the ANNs, the 6-5-3-2 ANN reached the best test performance with an MSE of  $0.68 \cdot 10^{-2}$ , but the simpler 6-3-2 ANN is second best (also in terms of MSE); it is interesting to see that simple nets can be almost as good as larger nets. Networks with seven inputs have in our case no substantial advantage over networks with six inputs. ANNs with two hidden



layers perform slightly better on the test data than ANNs with a single hidden layer. The overall correlation between network outputs and target values is in all cases quite high ( $r \geq 0.85$ ).

We also did a comparison for the turbulent momentum and heat fluxes  $\tau = \rho u_*^2$  and  $H = -\rho c_p u_* \theta_*$ , which are the quantities ultimately needed in climate simulations. Results for the momentum and heat fluxes of three well-performing networks as well as for the standard MOST method are shown in Figure 5 and Figure 6 and in Table 5 and Table 6 respectively. Both ANNs and the standard method tend to underestimate larger momentum fluxes, but differences among ANNs are quite small. Best agreement is achieved with the 6-5-3-2 ANN which is almost as good as the standard method.

Regarding the heat flux, the differences between the ANNs are again relatively small, but the ANNs as well as the standard method tend to overestimate the heat fluxes. Best results are obtained with the 6-3-2-ANN. For heat flux, the 7-5-2-2 ANN behaves markedly different than the other ANNs. It produces two distinct states, one around  $-30 \text{ Wm}^{-2}$  and the other from  $50 \text{ Wm}^{-2}$  to  $200 \text{ Wm}^{-2}$ ; as a result,  $r$  is reduced but MAE is lowest for this 7-5-2-2 ANN. Thus, the 7-5-2-2 ANN works more like a discrete classifier of stability rather than the continuous regression we are looking for. These results show again that smaller nets can be as good or even better than larger ones.

A comparison of the computation time required by the different ANNs relative to the 6-3-2 ANN is shown in Table 7. The table shows that the increase of computational demand is approximately proportional to the number of weights (as could be expected), and therefore increases considerably when two layer networks are used. As the discussion above shows, these costs are not reflected in a markedly higher quality of results. We can conclude that generalisation entails a reduced performance of the ANNs with quite small differences between the various ANNs. The performance of the ANNs is comparable to the standard MOST method, and the simplest 6-3-2 network has the best score in terms of accuracy and computational efficiency.

#### 20 4 Implementation of an ANN in a land surface model

As already mentioned, our goal is to replace the standard MOST method to calculate fluxes by an ANN in the land surface component of climate models, expecting more flexibility, accuracy and possibly saving of CPU time. The results presented in the previous section indicate that from the accuracy as well as computational efficiency point of view, the 6-3-2 ANN seems to be most suitable for implementation into a land surface model (LSM). This ANN is shown in Figure 7.

25 We implemented the 6-3-2 ANN with weights as found in the previous sections in a stand-alone version of the one-dimensional LSM Veg3d (Braun and Schädler, 2005); this replaced the implemented routine using the standard MOST method to calculate the scaling quantities  $u_*$  and  $\theta_*$ . We will call here the LSM version with the original standard MOST version the reference version. Input data for the ANN and data normalisation was the same as described in Chapter 2.3 and output was analogously de-normalised. Since the LSM requires apart from momentum and heat fluxes also the moisture flux, we calculated the scaling specific humidity  $q_*$  as proportional to  $\theta_*$  following the standard procedure in boundary layer meteorology (Arya, 2001). Meteorological input for the LSM was 30 min values of short- and long-wave radiation, wind speed, temperature, specific humidity and air pressure at two heights; additionally soil type and land use were prescribed; in the present study, these data were only available for the DE-Fal site for the year 2011 and for the DE-Tha site for the year 1998. For comparison with

observations, time series of heat and moisture fluxes as well as soil temperature and soil moisture in the upper soil layers were available, so that the effect of the ANN on the soil component could also be assessed. We performed the comparison with data from the DE-Fal (grassland, year 2011) and DE-Tha (evergreen needleleaf forest, year 1998) stations for years which had not yet been used neither for training nor for validation; thus, the data were new to the ANN in the sense that time periods were  
5 used which had not been used previously for training and validation. The DE-Tha site had not been used at all before, because the other sites selected in Chapter 2.3 were more consistent with MO than DE-Tha and because the DE-Tha time series covered only one year. We compared the RMSE and the correlation coefficient of the calculated values with the observed ones for the reference version and the ANN version. Additionally, we compared the required CPU times. The results of the comparison are shown in Table 8 and 9.

10 Especially for grassland, results of the standard version are very good in terms of RMSE and correlation coefficients and it is difficult for the ANN version to outperform this. However, the results show that the ANN version is able to produce results of similar quality as the standard version for the fluxes as well as for soil temperature and soil moisture. For tall vegetation, RMSEs are larger and correlation is less; but the differences between the ANN version and the reference version are even smaller than for grassland and for soil moisture the ANN version even outperforms the standard version. In terms of fluxes, the  
15 standard version is generally slightly better. Regarding CPU time, there are only minor differences, although we had expected the ANN version to be faster. However, due to the small prognostic time step used, once initialised, the standard version does in most cases not need to do more than one iteration to find a solution to the nonlinear equation and to update the scaling quantities, so that the expensive iteration is reduced considerably. In summary, as a result of this first comparison one can say that the ANN version works equally well as the reference version.

## 20 5 Summary

We have used an ANN (more precisely, a MLP) to obtain the scaling quantities  $u_*$  and  $\theta_*$  as defined in MOST; these are used in weather and climate models to calculate the turbulent fluxes of heat and momentum in the atmospheric surface layer. To train, validate and test the neural network, a large set of worldwide observations was used, representing tall vegetation (forests) and low vegetation (grassland, agricultural terrain). A quality assessment of the data sets showed that not all of them were  
25 compatible with MOST, so only 7 of the initially 20 data sets could be used.

Sensitivity studies were performed with different sets of input parameters, data sampling methods and network architectures; validation was done with 6-fold cross validation. An important part of the overall network validation was to check the ability of the network to generalise, i.e. to produce acceptable output if input is data from stations completely unknown to the network. These studies showed that even a relatively small 6-3-2 network with six input parameters and one hidden layer yields satisfying  
30 results in terms of RMSE and correlation coefficient. With respect to the trade-off between quality of results and computational efficiency, this network performed best.

We could show that results of the ANN were equivalent to the standard method in all tests we performed. A final validation with the heat and momentum fluxes instead of the scaling quantities showed that the traditional MOST method and the ANN

approach were also in this case almost equal in terms of quality, with the 6-3-2 ANN performing best. An implementation of the 6-3-2 ANN into an existing LSM showed that the ANN version gives results equivalent to the standard implementation with sometimes even higher correlations. However, no saving of computation time was found.

In summary, it could be shown that even in this stage, an ANN gives results comparable in quality to the standard MOST method. Some obvious improvements will include more and better differentiated land use classes (e.g. water, urban areas) and including more situations of strong stratification. Next steps will include more experiments with the input parameters (e.g. including a time lag) and some fine tuning to improve the computational efficiency (e.g. using different activation functions). We intend to implement and test the neural network routine in a three-dimensional regional climate model. This will require the ANN to learn some additional land use types like urban areas or water surfaces. If these tests are positive, this would open the possibility to replace other “uncertain” components of climate models (e.g. cloud microphysics, sea ice) by neural network subroutines, similar to the work described in Sarghini et al. (2003) and Vollant et al. (2017). The main hindrance to do that is presently the lack of suitable training and validation data. An alternative to “real” data could be to use data from more detailed models like LES or urban climate models.

*Code availability.* A MATLAB script (run.m) running the 6-3-2-net with a sample dataset (DE-KaN.dat) can be found under <http://doi.org/10.23728/b2share.36ef510c515c4a00bb963113647e44a9>.

*Data availability.* The data for this study have been obtained from the sources mentioned in the acknowledgements.

## Appendix A

*Author contributions.* LL was responsible for data collection, quality checks and data preprocessing. Also, he trained, validated and generalised the ANNs and compared them with the traditional MOST method. GS implemented the 6-3-2 network in a land surface model and carried out performance measurements in terms of result quality and computational time. GS prepared the manuscript with contributions from LL.

*Competing interests.* The authors declare that they have no conflict of interest.

*Acknowledgements.* The authors would like to thank following persons and institutions for providing station data: Martin Kohler and Rainer Steinbrecher (Karlsruhe Institute for Technology), Mathias Göckede, Olaf Kolle and Fanny Kittler (Max Planck Institute for Biogeochemistry Jena), Frank Beyrich (German Meteorological Office), Ingo Lange (University of Hamburg), Clemens Drüe (University of Trier), Marius

Schmidt (Forschungszentrum Jülich) and Thomas Grünwald (TU Dresden). In addition, data from following sources were collected and used: Integrated Carbon Observation System Sweden (ICOS), Cabauw Experimental Site for Atmospheric Research (CESAR) database, Oak Ridge National Laboratory Distributed Active Archive Center (ORNL DAAC) and University Corporation for Atmospheric Research (UCAR).

## References

- Andersen, T. and Martinez, T.: Cross validation and MLP architecture selection, in: *Neural Networks, 1999. IJCNN'99. International Joint Conference on*, vol. 3, pp. 1614–1619, IEEE, 1999.
- Arya, P. S.: *Introduction to micrometeorology*, Int. Geophys. series, San Diego, Calif. [u.a.], Academic Press, 79, 2001.
- 5 Braun, F. and Schädler, G.: Comparison of Soil Hydraulic Parameterizations for Mesoscale Meteorological Models., *J. Appl. Meteorol.*, 44, 1116–1132, 2005.
- Broyden, C. G.: The Convergence of a Class of Double-rank Minimization Algorithms 1. General Considerations, *IMA J. Appl. Math.*, 6, 76–90, <https://doi.org/10.1093/imamat/6.1.76>, 1970.
- Businger, J. A., Wyngaard, J. C., Izumi, Y., and Bradley, E. F.: Flux-Profile Relationships in the Atmospheric Surface Layer, *J. Atmos. Sci.*, 10 28, 181–189, [https://doi.org/10.1175/1520-0469\(1971\)028<0181:FPRITA>2.0.CO;2](https://doi.org/10.1175/1520-0469(1971)028<0181:FPRITA>2.0.CO;2), 1971.
- Chicco, D.: Ten quick tips for machine learning in computational biology, *BioData Mining*, 10, 35, 2017.
- Comrie, A. C.: Comparing neural networks and regression models for ozone forecasting, *J. Air Waste Manag. Assoc.*, 47, 653–663, 1997.
- Denmead, O. T. and Bradley, E. F.: Flux-Gradient Relationships in a Forest Canopy, in: *The Forest-Atmosphere Interaction: Proceedings of the Forest Environmental Measurements Conference held at Oak Ridge, Tennessee, October 23–28, 1983*, edited by Hutchison, B. A. and 15 Hicks, B. B., pp. 421–442, Springer Netherlands, Dordrecht, 1985.
- Domingos, P.: A few useful things to know about machine learning, *Commun. of the ACM*, 55, 78–87, 2012.
- Elkamel, A., Abdul-Wahab, S., Bouhamra, W., and Alper, E.: Measurement and prediction of ozone levels around a heavily industrialized area: a neural network approach, *Advances in environmental research*, 5, 47–59, 2001.
- Fletcher, R.: A new approach to variable metric algorithms, *Comput. J.*, 13, 317–322, 1970.
- 20 Foken, T.: *Micrometeorology*, SpringerLink : Bücher, Springer, Berlin, Heidelberg, 2nd ed. 2017 edn., 2017a.
- Foken, T.: *Energy and Matter Fluxes of a Spruce Forest Ecosystem*, vol. 229, Springer, 2017b.
- Gardner, M. and Dorling, S.: Neural network modelling and prediction of hourly NO<sub>x</sub> and NO<sub>2</sub> concentrations in urban air in London, *Atmospheric Environment*, 33, 709–719, 1999.
- Gentine, P., Pritchard, M., Rasp, S., Reinaudi, G., and Yacalis, G.: Could machine learning break the convection parameterization deadlock?, 25 *Geophysical Research Letters*, 2018.
- Goldfarb, D.: A family of variable-metric methods derived by variational means, *Math. Comput.*, 24, 23–26, 1970.
- Gomez-Sanchis, J., Martín-Guerrero, J. D., Soria-Olivas, E., Vila-Francés, J., Carrasco, J. L., and del Valle-Tascón, S.: Neural networks for analysing the relevance of input variables in the prediction of tropospheric ozone concentration, *Atmospheric Environ.*, 40, 6173–6180, 2006.
- 30 Högström, U.: Non-dimensional wind and temperature profiles in the atmospheric surface layer: A re-evaluation, *Bound.-Lay. Meteorol.*, 42, 55–78, <https://doi.org/10.1007/BF00119875>, 1988.
- Högström, U.: Review of some basic characteristics of the atmospheric surface layer, *Bound.-Lay. Meteorol.*, 78, 215–246, <https://doi.org/10.1007/BF00120937>, 1996.
- Hornik, K., Stinchcombe, M., and White, H.: Multilayer feedforward networks are universal approximators, *Neural Netw.*, 2, 359–366, 1989.
- 35 Knutti, R., Stocker, T., Joos, F., and Plattner, G.-K.: Probabilistic climate change projections using neural networks, *Climate Dynamics*, 21, 257–272, 2003.

- Kohavi, R.: A study of cross-validation and bootstrap for accuracy estimation and model selection, in: *Ijcai*, vol. 14, pp. 1137–1145, Montreal, Canada, 1995.
- Kolehmainen, M., Martikainen, H., and Ruuskanen, J.: Neural networks and periodic components used in air quality forecasting, *Atmospheric Environ.*, 35, 815–825, 2001.
- 5 Kruse, R., Borgelt, C., Braune, C., Mostaghim, S., and Steinbrecher, M.: *Computational intelligence: a methodological introduction*, Springer, 2016.
- Monin, A. and Obukhov, A.: Basic laws of turbulent mixing in the surface layer of the atmosphere, *Contrib. Geophys. Inst. Acad. Sci. USSR*, 151, e187, 1954.
- Rojas, R.: *Neural networks: a systematic introduction*, Springer Science & Business Media, 2013.
- 10 Sarghini, F., de Felice, G., and Santini, S.: Neural networks based subgrid scale modeling in large eddy simulations, *Computers & Fluids*, 32, 97–108, 2003.
- Shanno, D. F.: Conditioning of quasi-Newton methods for function minimization, *Math. Comput.*, 24, 647–656, 1970.
- Sodemann, H. and Foken, T.: Special characteristics of the temperature structure near the surface, *Theor. Appl. Climatol.*, 80, 81–89, 2005.
- Vollant, A., Balarac, G., and Corre, C.: Subgrid-scale scalar flux modelling based on optimal estimation theory and machine-learning procedures, *Journal of Turbulence*, 18, 854–878, <https://doi.org/10.1080/14685248.2017.1334907>, 2017.
- 15 Zhang, G. P.: Neural Networks For Data Mining, in: *Soft Computing for Knowledge Discovery and Data Mining*, edited by Maimon, O. and Rokach, L., chap. 21, pp. 17–44, Springer US, Boston, MA, [https://doi.org/10.1007/978-0-387-69935-6\\_2](https://doi.org/10.1007/978-0-387-69935-6_2), 2008.

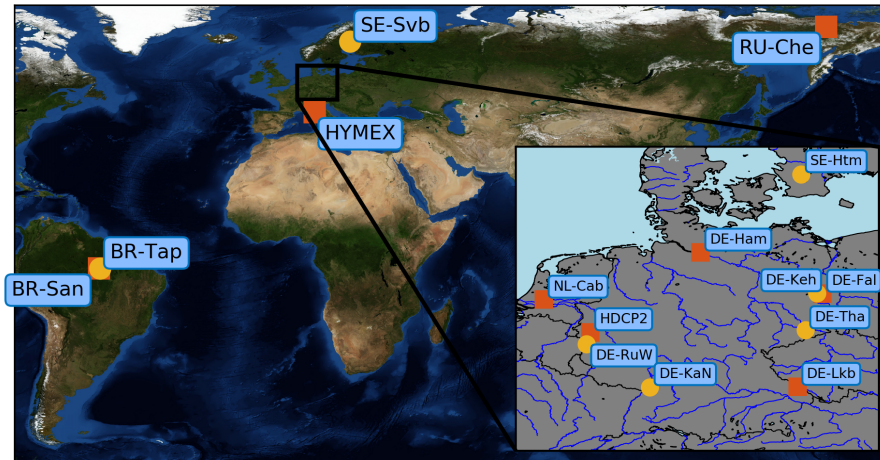

**Figure 1.** Location of the stations which provided data for this study. Station symbols are according to low (red square; grasslands, croplands, wetlands) and tall (yellow circle; forest) vegetation. HDCP2 includes stations DE-Nie07, DE-Nie13 and DE-Was06, HYMEX includes stations FR-CorX and FR-GiuX. Further information can be found in Table A1.

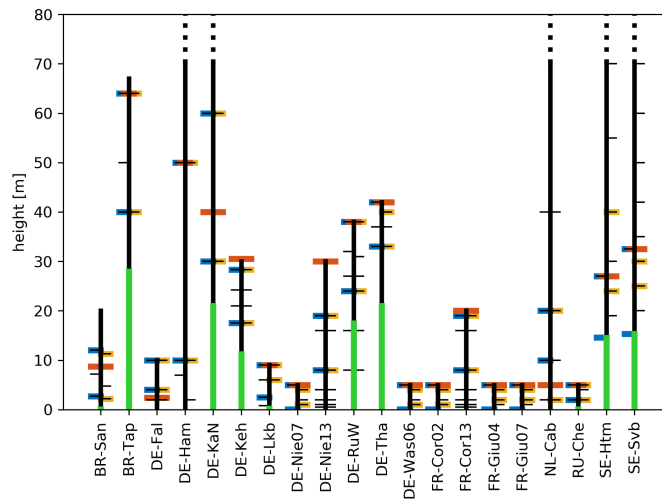

**Figure 2.** Schematic setup of the meteorological towers used for this study. Available measurements for wind velocity (black, left side arm) and temperature (black, right side arm) are shown as well as the finally used measurement height for wind (blue), temperature (yellow) and turbulent fluxes (red). Vegetation height is illustrated in green and towers with a total height above 80m are clipped.

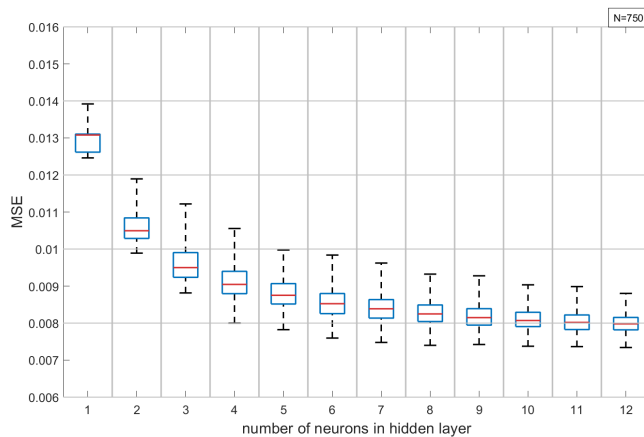

**Figure 3.** Network with six inputs and one hidden layer under six-fold cross-validation: MSE of the trained network on validation data set using random data split as a function of hidden layer size. Whiskers indicate interquartile range. Each box summarises results from 750 single networks.

**Table 1.** Fixed network parameters for training (after Zhang (2008); Kruse et al. (2016)).

|                                 |                                                                                  |
|---------------------------------|----------------------------------------------------------------------------------|
| normalisation                   | $\tilde{x}_i = (x_i - \min_{Data}(x_i)) / (\max_{Data}(x_i) - \min_{Data}(x_i))$ |
| activation function             | tangens hyperbolicus                                                             |
| activation function output      | linear                                                                           |
| training algorithm              | BFGS quasi-Newton backpropagation                                                |
| error metric                    | MSE                                                                              |
| early stopping after ... epochs | 50                                                                               |
| maximum number of epochs        | 1000                                                                             |
| training mode                   | batch                                                                            |



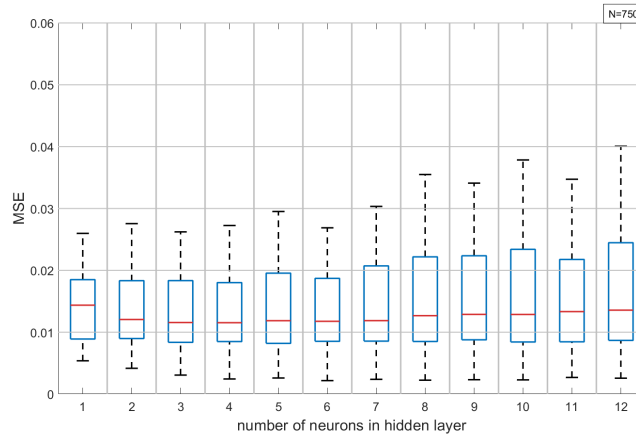

(a) six inputs and one hidden layer

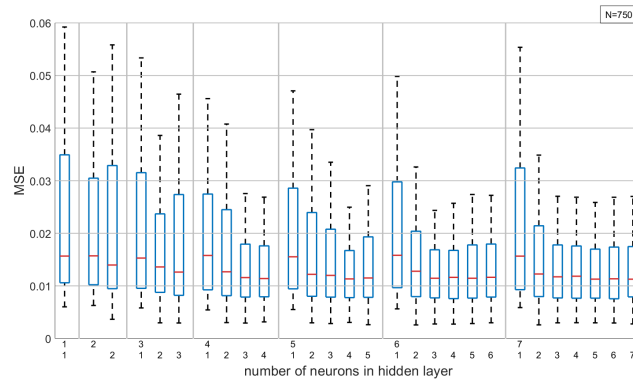

(b) seven inputs and two hidden layers

**Figure 4.** Validation MSE of trained networks using station-wise data split as a function of hidden layer size for (a) the network with six inputs and one hidden layer, (b) the network with seven inputs and two hidden layers. Numbers at the bottom axis indicate the number of neurons in the first (top row) and second (bottom row) hidden layer. Values for the other networks considered are similar. Whiskers indicate the length of interquartile range and each box summarises results from 750 single networks.

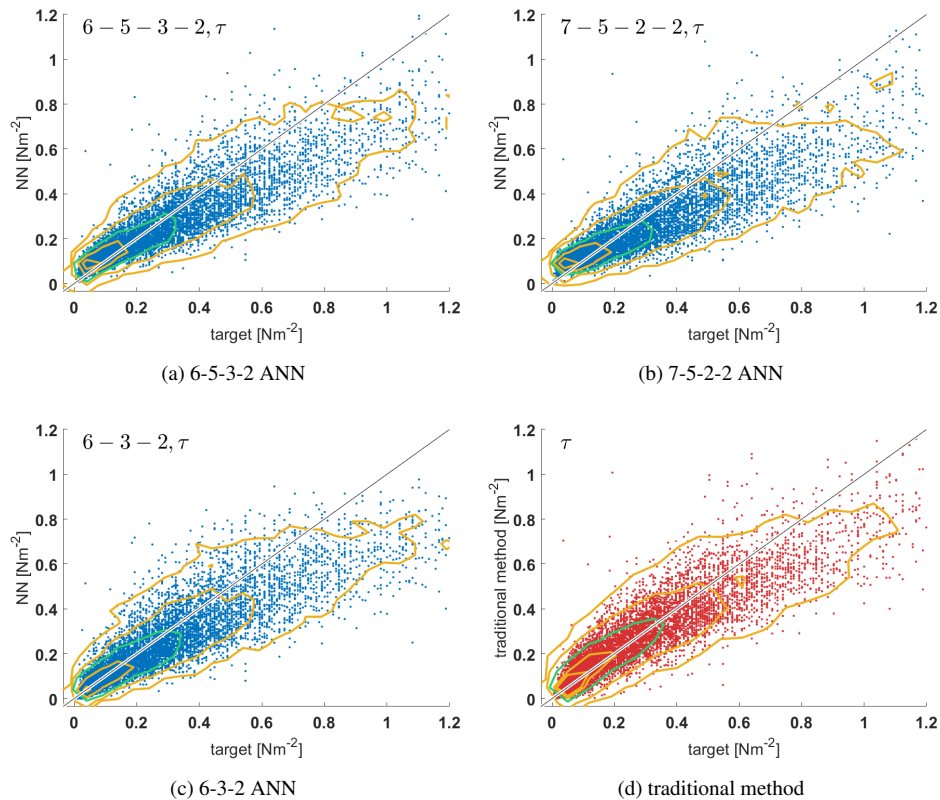

**Figure 5.** Plots of network output versus target values for momentum flux on unknown test data (DE-Keh). Contoured are kernel density estimates of two-dimensional probability density distribution with the 95th, 75th, 25th and 5th percentiles (yellow line) starting outside and the 50th percentile (green).

**Table 2.** Station information for the meteorological towers selected for training and validation (see Chapter 2.3); a list of all stations is given in Table A1. Land usage classification follows the International Geosphere-Biosphere Programme (IGBP) standards: evergreen needleleaf forests (ENF), grasslands (GRA), permanent wetlands (WET) and croplands (CRO).

| station | complete station name                      | lat [°] | lon [°] | height m a.s.l. | IGBP    | tower height [m] |
|---------|--------------------------------------------|---------|---------|-----------------|---------|------------------|
| BR-San  | Santarem Pasture Tower Site (Para, Brazil) | -3.02   | -54.89  | 100             | GRA/CRO | 20               |
| DE-Fal  | Grenzschichtmessfeld Falkenberg            | 52.17   | 14.12   | 73              | GRA     | 10               |
| DE-KaN  | KIT CN Messmast                            | 49.09   | 8.43    | 110             | ENF     | 200              |
| DE-Keh  | Messstation Forst Kehrigk                  | 52.18   | 13.95   | 49              | ENF     | 30               |
| NL-Cab  | CESAR observatory                          | 51.97   | 4.93    | -0.7            | GRA     | 213              |
| RU-Che  | Cherksii Tower                             | 68.61   | 161.34  | 6               | WET     | 5                |
| SE-Svb  | Svartberget ICOS Sweden                    | 64.25   | 19.77   | 270             | ENF     | 150              |

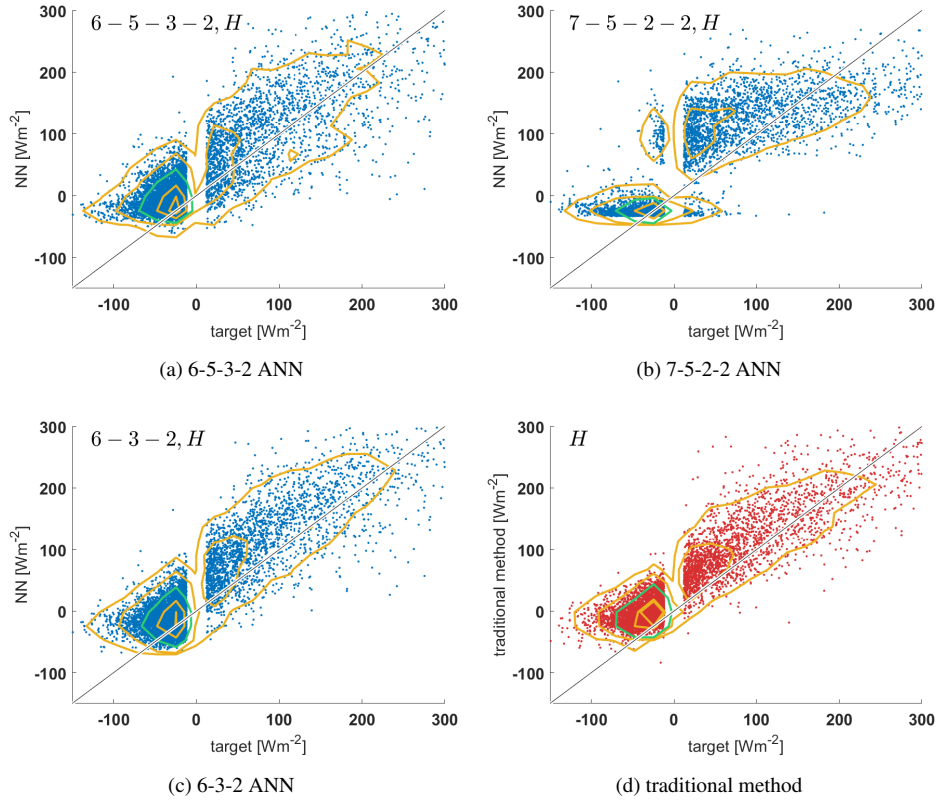

**Figure 6.** Plots of network output versus target values for heat flux on unknown test data (DE-Keh). Contoured are kernel density estimates of two-dimensional probability density distribution with the 95th, 75th, 25th and 5th percentiles (yellow line) starting outside and the 50th percentile (green). The vertical gap is due to the exclusion of heat fluxes between  $\pm 10 \text{ Wm}^{-2}$ .

**Table 3.** Time series information for the meteorological towers selected for training and validation. Count and availability are measured on an hourly interval and not on the original resolution of each time series.

| station | from       | to         | availability | count   |
|---------|------------|------------|--------------|---------|
| BR-San  | 2001-01-01 | 2005-09-22 | 61.59 %      | 25,503  |
| DE-Fal  | 2008-01-01 | 2009-12-21 | 70.06 %      | 12,118  |
| DE-KaN  | 2015-03-01 | 2016-12-30 | 77.90 %      | 12,541  |
| DE-Keh  | 2008-01-01 | 2009-12-29 | 69.85 %      | 12,207  |
| NL-Cab  | 2014-01-01 | 2017-11-30 | 94.22 %      | 32,337  |
| RU-Che  | 2014-05-26 | 2016-10-14 | 39.55 %      | 8,283   |
| SE-Svb  | 2015-01-18 | 2016-11-01 | 68.42 %      | 10,707  |
| total   |            |            |              | 113,696 |

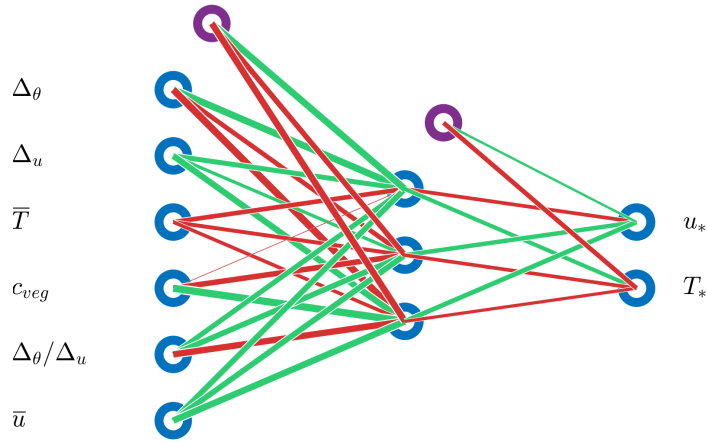

**Figure 7.** The architecture of the 6-3-2 ANN implemented in the land surface model. Input is described in sec. 2.5. Purple points are bias neurons.

**Table 4.** Performance results of overall best and best simple networks. MSE and  $r$  are measured on normalised data and are non-dimensional.  $MSE_v$  and  $r_v$  are calculated on validation data and  $MSE_t$  and  $r_t$  on test data. Also, performance of traditional MOST method (benchmark) is shown.

| condition        | net structure | # weights | $MSE_v[10^{-2}]$ | $r_v$ | $MSE_t[10^{-2}]$ | $r_t$ |
|------------------|---------------|-----------|------------------|-------|------------------|-------|
| overall best net | 6-5-2         | 47        | 0.17             | 0.94  | 0.90             | 0.89  |
|                  | 7-11-2        | 112       | 0.18             | 0.92  | 0.96             | 0.86  |
|                  | 6-5-3-2       | 61        | 0.20             | 0.93  | 0.68             | 0.88  |
|                  | 7-5-2-2       | 58        | 0.19             | 0.92  | 0.79             | 0.88  |
| best simple net  | 6-3-2         | 29        | 0.38             | 0.92  | 0.74             | 0.87  |
|                  | 7-4-2         | 42        | 0.21             | 0.92  | 1.36             | 0.87  |
|                  | 6-3-3-2       | 41        | 0.27             | 0.91  | 0.84             | 0.85  |
|                  | 7-4-2-2       | 48        | 0.22             | 0.90  | 1.01             | 0.86  |
| benchmark        | -             | -         | 0.92             | 0.85  | 0.58             | 0.92  |

**Table 5.** Performance of networks vs. standard MOST method (benchmark) for momentum flux at the DE-Keh site.

| net structure | MSE[ $10^{-2}\text{N}^2\text{m}^{-4}$ ] | RMSE[ $\text{Nm}^{-2}$ ] | MAE[ $\text{Nm}^{-2}$ ] | $r$  |
|---------------|-----------------------------------------|--------------------------|-------------------------|------|
| 6-5-3-2       | 2.11                                    | 0.15                     | 0.09                    | 0.90 |
| 7-5-2-2       | 2.44                                    | 0.16                     | 0.10                    | 0.89 |
| 6-3-2         | 2.56                                    | 0.16                     | 0.09                    | 0.87 |
| benchmark     | 1.72                                    | 0.13                     | 0.08                    | 0.90 |

**Table 6.** Performance of networks vs. standard MOST method (benchmark) for heat flux at the DE-Keh site.

| net structure | MSE[ $\text{W}^2\text{m}^{-4}$ ] | RMSE[ $\text{Wm}^{-2}$ ] | MAE[ $\text{Wm}^{-2}$ ] | $r$  |
|---------------|----------------------------------|--------------------------|-------------------------|------|
| 6-5-3-2       | 2461                             | 49.6                     | 37.6                    | 0.85 |
| 7-5-2-2       | 2329                             | 48.3                     | 31.4                    | 0.82 |
| 6-3-2         | 2092                             | 45.8                     | 35.1                    | 0.88 |
| benchmark     | 1915                             | 43.8                     | 34.4                    | 0.90 |

**Table 7.** Relative computational demand of the ANNs discussed in the text.

| net structure | no. of weights | CPU time (relative to 6-3-2 ANN) |
|---------------|----------------|----------------------------------|
| 6-3-2         | 29             | 1                                |
| 6-5-2         | 47             | 1.6                              |
| 7-11-2        | 112            | 3.7                              |
| 6-5-3-2       | 61             | 2.5                              |
| 7-5-2-2       | 58             | 2.4                              |

**Table 8.** Comparison of the reference version with the ANN version of Veg3d for the DE-Fal grassland station.  $H$  denotes the heat flux,  $M$  is moisture flux,  $T_s$  is soil temperature,  $w_s$  is soil moisture.

|                                   | Ref   | ANN   |
|-----------------------------------|-------|-------|
| CPU time                          | 10.83 | 10.65 |
| RMSE $H$ [ $\text{Wm}^{-2}$ ]     | 16.8  | 27.3  |
| $rH$                              | 0.87  | 0.81  |
| RMSE $M$ [ $\text{Wm}^{-2}$ ]     | 15.1  | 20.5  |
| $rM$                              | 0.91  | 0.86  |
| RMSE $T_s$ [ $^{\circ}\text{C}$ ] | 0.8   | 1.3   |
| $rT_s$                            | .99   | .99   |
| RMSE $w_s$ [%]                    | 4.8   | 5.5   |
| $rw_s$                            | 0.87  | 0.89  |

**Table 9.** Same as above, but for forest station DE-Tha

|                                   | Ref   | ANN   |
|-----------------------------------|-------|-------|
| CPU time                          | 95.47 | 97.74 |
| RMSE $H$ [ $\text{Wm}^{-2}$ ]     | 39.0  | 40.9  |
| $rH$                              | 0.52  | 0.57  |
| RMSE $M$ [ $\text{Wm}^{-2}$ ]     | 27.9  | 33.1  |
| $rM$                              | 0.78  | 0.71  |
| RMSE $T_s$ [ $^{\circ}\text{C}$ ] | 2.4   | 2.2   |
| $rT_s$                            | 0.98  | 0.98  |
| RMSE $w_s$ [%]                    | 5.3   | 3.7   |
| $rw_s$                            | 0.53  | 0.75  |

**Table A1.** Station information for all collected meteorological towers. Land use classification follows the International Geosphere-Biosphere Programme (IGBP) standards: evergreen needleleaf forests (ENF), evergreen broadleaf forests (EBF), grasslands (GRA), permanent wetlands (WET) and croplands (CRO).

| station  | complete station name                            | lat [°] | lon [°] | height m a.s.l. | IGBP    | tower height [m] |
|----------|--------------------------------------------------|---------|---------|-----------------|---------|------------------|
| BR-San   | Santarem Pasture Tower Site (Para, Brazil)       | -3.02   | -54.89  | 100             | GRA/CRO | 20               |
| BR-Tap   | Tapajos National Forest (Santarem, Para, Brazil) | -3.01   | -54.58  | 100             | EBF     | 67               |
| DE-Fal   | Grenzsichtmessfeld Falkenberg                    | 52.17   | 14.12   | 73              | GRA     | 10               |
| DE-Ham   | Wettermast Hamburg                               | 53.52   | 10.10   | 0.3             | GRA     | 300              |
| DE-KaN   | KIT CN Messmast                                  | 49.09   | 8.43    | 110             | ENF     | 200              |
| DE-Keh   | Messstation Forst Kehrigk                        | 52.18   | 13.95   | 49              | ENF     | 30               |
| DE-Lkb   | Lackenberg Messstation                           | 49.10   | 13.30   | 1300            | GRA     | 9                |
| DE-Nie07 | HDCP2 Flux Station 07 Hambach Niederzier         | 50.90   | 6.46    | 110             | GRA     | 5                |
| DE-Nie13 | HDCP2 Tower 13 Hambach Niederzier                | 50.90   | 6.46    | 110             | GRA     | 30               |
| DE-RuW   | Wüstebach                                        | 50.50   | 6.33    | 621             | ENF     | 38               |
| DE-Tha   | Anchor Station Tharandt                          | 50.96   | 13.57   | 380             | ENF     | 42               |
| DE-Was06 | HDCP2 Flux Station 06 Wasserwerk                 | 50.89   | 6.43    | 96              | CRO     | 5                |
| FR-Cor02 | HYMEX Flux Station 02 Corte                      | 43.30   | 9.17    | 369             | GRA     | 5                |
| FR-Cor13 | HYMEX Tower 13 Corte                             | 43.30   | 9.17    | 369             | GRA     | 20               |
| FR-Giu04 | HYMEX Flux Station 04 San-Giuliano               | 42.27   | 9.52    | 39              | GRA     | 5                |
| FR-Giu07 | HYMEX Flux Station 07 San-Giuliano               | 42.27   | 9.52    | 39              | GRA     | 5                |
| NL-Cab   | CESAR observatory                                | 51.97   | 4.93    | -0.7            | GRA     | 213              |
| RU-Che   | Cherkii Tower                                    | 68.61   | 161.34  | 6               | WET     | 5                |
| SE-Htm   | Hyltemossa ICOS Sweden                           | 56.10   | 13.42   | 115             | ENF     | 150              |
| SE-Svb   | Svartberget ICOS Sweden                          | 64.25   | 19.77   | 270             | ENF     | 150              |
